# Supplementary material for: Do Climate Change Policies Promote or Conflict with Subjective Wellbeing: A Case Study of Suzhou, China
Source: MDPI journal article supplement (doi:10.3390/ijerph13030344), 2016-03-21
Supplement: s1 [file s1]

# Supplementary Materials: Do Climate Change Policies Promote or Conflict with Subjective Wellbeing: A Case Study of Suzhou, China

Miaomiao Liu, Yining Huang, Rosemary Hiscock, Qin Li, Jun Bi, Patrick L. Kinney and Clive E. Sabel

**Table S1.** The details of eight sample sites.

| Sites ID | Name                   | Location | Number of Samples | Description of Sites                                                                                                                                                                                                    |
|----------|------------------------|----------|-------------------|-------------------------------------------------------------------------------------------------------------------------------------------------------------------------------------------------------------------------|
| A        | Guanqian Street-1      | Gusu     | 109               | Guanqian Street is the bustling downtown of Suzhou and is frequented by people from all districts. Due to the large potential typical samples with all ages and large area itself, we set two sites in Guanqian Street. |
| B        | Guanqian Street-2      | Gusu     | 71                |                                                                                                                                                                                                                         |
| C        | Auchan Supermarket     | SIP      | 121               | Many people living in Suzhou Industrial Park (SIP), visit Auchan Supermarket.                                                                                                                                           |
| D        | Suxiu Road             | SIP      | 101               | Suxiu Road, is the location of many banks in SIP and visited by numbers of local people.                                                                                                                                |
| E        | Suzhou Railway Station | Gusu     | 71                | Suzhou Railway Station has lots of foot traffic from all districts of Suzhou.                                                                                                                                           |
| F        | Shantang Street        | Gusu     | 117               | Shantang Street is acclaimed as “the number one street in Gusu” and is located in the historical zone in Suzhou. It is mostly frequented by local people.                                                               |
| G        | Shilu Street           | Gusu     | 119               | Shilu is a pedestrian street with hundreds of historic famous shops along it, and is visited by a large number of people living in Gusu.                                                                                |
| H        | Meiluo Square          | Gaoxin   | 76                | Gaoxin district in western Suzhou is another industrial development zone. Meiluo Square is visited by large numbers of people working in High-Tech industry.                                                            |

**Table S2.** Demographic characteristic of respondents.

| Demographic Characteristic Variables   | Survey <i>n</i> = 775 (%) | Population of Suzhou <i>n</i> = 6.4 Million (%) |
|----------------------------------------|---------------------------|-------------------------------------------------|
| <b>Sex</b>                             |                           |                                                 |
| Female                                 | 54                        | 51                                              |
| Male                                   | 46                        | 49                                              |
| <b>Age in years</b>                    |                           |                                                 |
| ≤39                                    | 85                        | 45                                              |
| ≥40                                    | 15                        | 55                                              |
| <b>Education</b>                       |                           |                                                 |
| primary or below                       | 1                         | 32                                              |
| Junior school                          | 8                         | 32                                              |
| Senior or Secondary specialized school | 23                        | 18                                              |
| Junior college                         | 24                        | 10                                              |
| Bachelor                               | 40                        | 7                                               |
| Master or above                        | 4                         | 1                                               |
| <b>Household monthly income</b>        |                           |                                                 |
| <2000 RMB                              | 4                         | 40                                              |
| 2000–4999 RMB                          | 31                        | 51                                              |
| ≥5000 RMB                              | 65                        | 9                                               |

**Table S3.** How satisfied are you with the following issues?

| Observations                         |                      | Your Current Job |      | Your Family Life |      | Your Apartment |      | Your Neighbors |      | Your Social Life |      | Air Quality   |      | Your Health  |      |
|--------------------------------------|----------------------|------------------|------|------------------|------|----------------|------|----------------|------|------------------|------|---------------|------|--------------|------|
|                                      |                      | N                | %    | N                | %    | N              | %    | N              | %    | N                | %    | N             | %    | N            | %    |
| Valid                                | 1 highly unsatisfied | 51               | 6.6  | 20               | 2.6  | 32             | 4.1  | 29             | 3.7  | 26               | 3.4  | 79            | 10.2 | 20           | 2.6  |
|                                      | 2                    | 84               | 10.8 | 53               | 6.8  | 94             | 12.1 | 77             | 9.9  | 91               | 11.7 | 197           | 25.4 | 281          | 36.3 |
|                                      | 3                    | 281              | 36.3 | 161              | 20.8 | 204            | 26.3 | 239            | 30.8 | 303              | 39.1 | 306           | 39.5 | 379          | 48.9 |
|                                      | 4                    | 213              | 27.5 | 276              | 35.6 | 261            | 33.7 | 254            | 32.8 | 237              | 30.6 | 144           | 18.6 | 84           | 10.8 |
|                                      | 5 highly satisfied   | 115              | 14.8 | 255              | 32.9 | 178            | 23   | 165            | 21.3 | 109              | 14.1 | 42            | 5.4  | -            | -    |
|                                      | total                | 744              | 96   | 765              | 98.7 | 769            | 99.2 | 764            | 98.6 | 766              | 98.8 | 768           | 99.1 | 764          | 98.6 |
| Missing                              |                      | 31               | 4    | 10               | 1.3  | 6              | 0.8  | 11             | 1.4  | 9                | 1.2  | 7             | 0.9  | 11           | 1.4  |
| Total                                |                      | 775              | 100  | 775              | 100  | 775            | 100  | 775            | 100  | 775              | 100  | 775           | 100  | 775          | 100  |
| Median Wellbeing                     |                      |                  |      |                  |      |                |      |                |      |                  |      |               |      |              |      |
| 1 highly unsatisfied                 |                      | 46.0             |      | 60.0             |      | 54.0           |      | 60.0           |      | 56.0             |      | 52.0          |      | 34.0         |      |
| 2                                    |                      | 48.0             |      | 44.0             |      | 44.0           |      | 52.0           |      | 50.0             |      | 56.0          |      | 52.0         |      |
| 3                                    |                      | 52.0             |      | 52.0             |      | 52.0           |      | 52.0           |      | 52.0             |      | 56.0          |      | 60.0         |      |
| 4                                    |                      | 64.0             |      | 56.0             |      | 60.0           |      | 60.0           |      | 64.0             |      | 60.0          |      | 68.0         |      |
| 5 highly satisfied                   |                      | 68.0             |      | 64.0             |      | 64.0           |      | 64.0           |      | 64.0             |      | 64.0          |      | -            |      |
| total                                |                      | 56.0             |      | 56.0             |      | 56.0           |      | 56.0           |      | 56.0             |      | 56.0          |      | 56.0         |      |
| Spearman's rho                       |                      | 0.319 **         |      | 0.279 **         |      | 0.256 **       |      | 0.202 **       |      | 0.303 **         |      | 0.163 **      |      | 0.276 **     |      |
| p                                    |                      | 0.000            |      | 0.000            |      | 0.000          |      | 0.000          |      | 0.000            |      | 0.000         |      | 0.000        |      |
| n                                    |                      | 733              |      | 754              |      | 758            |      | 754            |      | 756              |      | 757           |      | 754          |      |
| GLM controlling for design variables |                      |                  |      |                  |      |                |      |                |      |                  |      |               |      |              |      |
| b                                    |                      | 2.2 **           |      | 0.6              |      | 0.4            |      | -0.6           |      | 1.8 **           |      | 0.8           |      | 4.6 **       |      |
| 95% CI                               |                      | (0.9 to 3.5)     |      | (-0.8 to 1.9)    |      | (-0.9 to -1.7) |      | (-2.0 to 0.7)  |      | (0.5 to 3.2)     |      | (-0.4 to 2.0) |      | (2.7 to 6.5) |      |

\*\*  $p < 0.05$ ; missing cases codes as midpoint 3; 0<sup>a</sup> is the reference group that other levels of the factor are compared to.

**Table S4.** Ontological security: Below are some opinions people might have about themselves. How strongly do you agree or disagree with each one?

| Observations                         |                     | I Enjoy a Challenge |      | I Can Deal with Stress |      | I'm Frightened of Change         |      | I Can Do what I Want, When I Want |      | Most People Would Like a Life Like Mine |      |
|--------------------------------------|---------------------|---------------------|------|------------------------|------|----------------------------------|------|-----------------------------------|------|-----------------------------------------|------|
|                                      |                     |                     | %    | N                      | %    | N                                | %    | N                                 | %    | N                                       | %    |
| Valid                                | 1 strongly disagree | 4                   | 0.5  | 3                      | 0.4  | 27                               | 3.5  | 17                                | 2.2  | 20                                      | 2.6  |
|                                      | 2                   | 44                  | 5.7  | 39                     | 5    | 181                              | 23.4 | 241                               | 31.1 | 178                                     | 23   |
|                                      | 3                   | 248                 | 32   | 187                    | 24.1 | 299                              | 38.6 | 267                               | 34.5 | 364                                     | 47   |
|                                      | 4                   | 337                 | 43.5 | 446                    | 57.5 | 201                              | 25.9 | 178                               | 23   | 162                                     | 20.9 |
|                                      | 5 strongly agree    | 137                 | 17.7 | 95                     | 12.3 | 52                               | 6.7  | 60                                | 7.7  | 40                                      | 5.2  |
|                                      | total               | 770                 | 99.4 | 770                    | 99.4 | 760                              | 98.1 | 763                               | 98.5 | 764                                     | 98.6 |
| Missing                              |                     | 5                   | 0.6  | 5                      | 0.6  | 15                               | 1.9  | 12                                | 1.5  | 11                                      | 1.4  |
| Total                                |                     | 775                 | 100  | 775                    | 100  | 775                              | 100  | 775                               | 100  | 775                                     | 100  |
| Mean wellbeing                       |                     |                     |      |                        |      |                                  |      |                                   |      |                                         |      |
| 1 strongly disagree                  |                     | 60                  |      | 36                     |      | 64                               |      | 48                                |      | 26                                      |      |
| 2                                    |                     | 50                  |      | 40                     |      | 60                               |      | 52                                |      | 48                                      |      |
| 3                                    |                     | 56                  |      | 52                     |      | 56                               |      | 60                                |      | 60                                      |      |
| 4                                    |                     | 60                  |      | 60                     |      | 56                               |      | 64                                |      | 64                                      |      |
| 5 strongly agree                     |                     | 60                  |      | 60                     |      | 52                               |      | 64                                |      | 64                                      |      |
| total                                |                     | 56                  |      | 56                     |      | 56                               |      | 56                                |      | 56                                      |      |
| Spearman's rho                       |                     | 0.130 **            |      | 0.176 **               |      | −0.085 *                         |      | 0.228 **                          |      | 0.303 **                                |      |
| p                                    |                     | 0                   |      | 0                      |      | 0.02                             |      | 0                                 |      | 0                                       |      |
| n                                    |                     | 760                 |      | 760                    |      | 751                              |      | 753                               |      | 754                                     |      |
| GLM controlling for design variables |                     |                     |      |                        |      |                                  |      |                                   |      |                                         |      |
| b                                    |                     | −0.4                |      | 0.7                    |      | 0.6                              |      | 0.2                               |      | 2.2 **                                  |      |
| 95% CI                               |                     | (−2.0 to 1.2)       |      | (−1.2 to 2.6)          |      | (−0.6 to 1.9)                    |      | (−1.2 to 1.6)                     |      | (0.9 to 3.5)                            |      |
| Observations                         |                     | I Feel in Control   |      | I Feel Safe            |      | I Worry about Things Going Wrong |      | I Feel I'm Doing Well in Life     |      | My Life Has a Sense of Routine          |      |
|                                      |                     | N                   | %    | N                      | %    | N                                | %    | N                                 | %    | N                                       | %    |
| Valid                                | 1 strongly disagree | 13                  | 1.7  | 16                     | 2.1  | 37                               | 4.8  | 2                                 | 0.3  | 15                                      | 1.9  |
|                                      | 2                   | 157                 | 20.3 | 119                    | 15.4 | 263                              | 33.9 | 42                                | 5.4  | 92                                      | 11.9 |
|                                      | 3                   | 274                 | 35.4 | 223                    | 28.8 | 235                              | 30.3 | 193                               | 24.9 | 267                                     | 34.5 |
|                                      | 4                   | 276                 | 35.6 | 344                    | 44.4 | 189                              | 24.4 | 454                               | 58.6 | 342                                     | 44.1 |
|                                      | 5 strongly agree    | 43                  | 5.5  | 59                     | 7.6  | 38                               | 4.9  | 65                                | 8.4  | 49                                      | 6.3  |
|                                      | total               | 763                 | 98.5 | 761                    | 98.2 | 762                              | 98.3 | 756                               | 97.5 | 765                                     | 98.7 |

Table S4. Cont.

| Observations                                | I Feel in Control |                      | I Feel Safe |                     | I Worry about Things<br>Going Wrong |                      | I Feel I'm Doing<br>Well in Life |                     | My Life Has a Sense of<br>Routine |                       |
|---------------------------------------------|-------------------|----------------------|-------------|---------------------|-------------------------------------|----------------------|----------------------------------|---------------------|-----------------------------------|-----------------------|
|                                             | N                 | %                    | N           | %                   | N                                   | %                    | N                                | %                   | N                                 | %                     |
| Missing                                     | 12                | 1.5                  | 14          | 1.8                 | 13                                  | 1.7                  | 19                               | 2.5                 | 10                                | 1.3                   |
| <b>Total</b>                                | <b>775</b>        | <b>100</b>           | <b>775</b>  | <b>100</b>          | <b>775</b>                          | <b>100</b>           | <b>775</b>                       | <b>100</b>          | <b>775</b>                        | <b>100</b>            |
| <b>Mean wellbeing</b>                       |                   |                      |             |                     |                                     |                      |                                  |                     |                                   |                       |
| 1 strongly disagree                         |                   | 60                   |             | 36                  |                                     | 64                   |                                  | 34                  |                                   | 64                    |
| 2                                           |                   | 50                   |             | 48                  |                                     | 60                   |                                  | 40                  |                                   | 62                    |
| 3                                           |                   | 56                   |             | 56                  |                                     | 56                   |                                  | 48                  |                                   | 60                    |
| 4                                           |                   | 64                   |             | 60                  |                                     | 56                   |                                  | 60                  |                                   | 56                    |
| 5 strongly agree                            |                   | 72                   |             | 76                  |                                     | 50                   |                                  | 72                  |                                   | 48                    |
| <b>total</b>                                |                   | <b>56</b>            |             | <b>56</b>           |                                     | <b>56</b>            |                                  | <b>56</b>           |                                   | <b>56</b>             |
| <b>Spearman's rho</b>                       |                   | <b>0.264 **</b>      |             | <b>0.333 **</b>     |                                     | <b>−0.117 **</b>     |                                  | <b>0.353 **</b>     |                                   | <b>−0.160 **</b>      |
| <i>p</i>                                    |                   | 0                    |             | 0                   |                                     | 0.001                |                                  | 0                   |                                   | 0                     |
| <i>n</i>                                    |                   | 754                  |             | 751                 |                                     | 752                  |                                  | 746                 |                                   | 754                   |
| <b>GLM controlling for design variables</b> |                   |                      |             |                     |                                     |                      |                                  |                     |                                   |                       |
| <b>b</b>                                    |                   | <b>0.5</b>           |             | <b>4.2 **</b>       |                                     | <b>0.6</b>           |                                  | <b>3.6 **</b>       |                                   | <b>−2.1 **</b>        |
| <b>95% CI</b>                               |                   | <b>(−1.1 to 2.1)</b> |             | <b>(2.8 to 5.5)</b> |                                     | <b>(−0.6 to 1.7)</b> |                                  | <b>(1.6 to 5.7)</b> |                                   | <b>(−3.6 to −0.7)</b> |

\*  $p < 0.10$ ; \*\*  $p < 0.05$ ; missing cases are coded as midpoint 3; 0<sup>a</sup> is the reference group that other levels of the factor are compared to; Scale reversed for “I'm frightened of change”, “I worry about things going wrong”.

Table S5. Home environment variables.

| Variables                                                     | N   | %     | Median Wellbeing | GLM b (95% CI)         |
|---------------------------------------------------------------|-----|-------|------------------|------------------------|
| <i>Access to heating and cooling devices in your house</i>    |     |       | <i>p = 0.002</i> |                        |
| No devices/ never use                                         | 65  | 8.4   | 48.0             | 0.1 (−3.8 to 4.0)      |
| partly use                                                    | 85  | 11.0  | 56.0             | −3.0 (−6.7 to 0.7)     |
| full use                                                      | 597 | 77.0  | 60.0             | 0 <sup>a</sup>         |
| total                                                         | 747 | 96.4  | 56.0             |                        |
| System                                                        | 28  | 3.6   |                  |                        |
| Total                                                         | 775 | 100.0 |                  |                        |
| <i>Distance to green space <sup>a</sup></i>                   |     |       | <i>p = 0.004</i> |                        |
| less than 10-min walk                                         | 403 | 52.0  | 60.0             | 0.8 (−2.7 to 4.4)      |
| 10-min to 30-min walk                                         | 243 | 31.4  | 56.0             | −0.5 (−4.0 to 3.1)     |
| more than 30-min walk                                         | 114 | 14.7  | 56.0             | 0 <sup>a</sup>         |
| total                                                         | 760 | 98.1  | 56.0             |                        |
| System                                                        | 15  | 1.9   |                  |                        |
| Total                                                         | 775 | 100.0 |                  |                        |
| <i>Near to busy road</i>                                      |     |       | <i>p = 0.001</i> |                        |
| No                                                            | 267 | 34.5  | 56.0             | −2.9 ** (−5.2 to −0.6) |
| Yes                                                           | 498 | 64.3  | 60.0             | 0 <sup>a</sup>         |
| total                                                         | 765 | 98.7  | 56.0             |                        |
| System                                                        | 10  | 1.3   |                  |                        |
| Total                                                         | 775 | 100.0 |                  |                        |
| <i>Annoyed by the noise when you are at home <sup>a</sup></i> |     |       | <i>p = 0.005</i> |                        |
| At no time                                                    | 76  | 9.8   | 64.0             | 5.3 ** (1.1 to 9.4)    |
| less than half of the time                                    | 534 | 68.9  | 60.0             | 2.8 (−0.1 to 5.7)      |
| more than half of the time                                    | 154 | 19.9  | 52.0             | 0 <sup>a</sup>         |
| total                                                         | 764 | 98.6  | 56.0             |                        |
| System                                                        | 11  | 1.4   |                  |                        |
| Total                                                         | 775 | 100.0 |                  |                        |

Table S5. Cont.

| Variables                                                                  | N   | %     | Median Wellbeing | GLM b (95% CI)         |
|----------------------------------------------------------------------------|-----|-------|------------------|------------------------|
| <i>Main household fuel type<sup>b</sup></i>                                |     |       | <i>p</i> = 0.110 |                        |
| Coal & wood                                                                | 32  | 4.1   | 58.0             | −6.1 (−11.9 to −0.3)   |
| Liquefied gas                                                              | 173 | 22.3  | 56.0             | 0.1 (−2.7 to 2.8)      |
| Electricity                                                                | 105 | 13.5  | 56.0             | −2.7 (−6.6 to 1.2)     |
| Other                                                                      | 22  | 2.8   | 56.0             | −2.2 (−7.2 to 2.9)     |
| Natural gas                                                                | 413 | 53.3  | 60.0             | 0 <sup>a</sup>         |
| total                                                                      | 745 | 96.1  | 56.0             |                        |
| System                                                                     | 30  | 3.9   |                  |                        |
| Total                                                                      | 775 | 100.0 |                  |                        |
| <i>Is there smoke lampblack machine/range hood in your kitchen?</i>        |     |       | <i>p</i> = 0.010 |                        |
| No                                                                         | 101 | 13.0  | 52.0             | −4.6 ** (−8.3 to −0.9) |
| Other                                                                      | 56  | 7.2   | 60.0             | −4.0 (−9.5 to 1.4)     |
| Yes                                                                        | 618 | 79.7  | 60.0             | 0 <sup>a</sup>         |
| Total                                                                      | 775 | 100.0 | 56.0             |                        |
| <i>Frequency of exchanging small favors with your neighbor<sup>c</sup></i> |     |       | <i>p</i> = 0.636 |                        |
| Never                                                                      | 227 | 29.3  | 60.0             | 0.2 (−3.2 to 3.7)      |
| Once a week                                                                | 52  | 6.7   | 56.0             | −0.8 (−5.8 to 4.2)     |
| 2–4 times in a week                                                        | 210 | 27.1  | 60.0             | 1.1 (−2.0 to 4.2)      |
| more than 4 times in a week                                                | 164 | 21.2  | 56.0             | 0 <sup>a</sup>         |
| total                                                                      | 653 | 84.3  | 56.0             |                        |
| System                                                                     | 122 | 15.7  |                  |                        |
| Total                                                                      | 775 | 100.0 |                  |                        |

\*\*  $p < 0.05$ ; <sup>a</sup> missing values are recoded as midpoint 2; <sup>b</sup> missing value are recoded as “other”; <sup>c</sup> missing values are recoded as the median; 0<sup>a</sup> is the reference group that other levels of the factor are compared to.

**Table S6.** Transport model.

| Transport Mode in Summer              | N   | %     | Median Wellbeing        | GLM b (95% CI)     |
|---------------------------------------|-----|-------|-------------------------|--------------------|
| <b>I make most of my journeys by:</b> |     |       | <b><i>p</i> = 0.580</b> |                    |
| Motorbike                             | 29  | 3.7   | 60                      | 2.8 (−2.6 to 8.1)  |
| Car                                   | 80  | 10.3  | 56                      | −1.8 (−5.5 to 1.9) |
| Bike                                  | 43  | 5.5   | 56                      | 2.1 (−2.5 to 6.7)  |
| Walk                                  | 44  | 5.7   | 64                      | 1.2 (−4.4 to 6.9)  |
| Other <sup>a</sup>                    | 363 | 46.8  | 60                      | 0.1 (−2.6 to 2.8)  |
| Public transport                      | 216 | 27.9  | 56                      | 0 <sup>a</sup>     |
| Total                                 | 775 | 100.0 |                         |                    |

<sup>a</sup> missing cases are coded as “other”; 0 <sup>a</sup> is the reference group that other levels of the factor are compared to; Because questionnaire survey was conducted in the summer, winter journeys were not included in the multivariate modeling.

**Table S7.** Below are some statements about environment. How strongly do you agree or disagree with each one?

| Observations                                | Air Pollution Could be Ignored in the Past 2 Weeks |                      | Air Pollution Has Negative Impacts on Physical Health |                      | Air Pollution Has Negative Impacts on Happiness |                      | Sacrifice some Air Quality to the Faster Economic Development |                      | Suzhou's Air Quality Will be Improved in Near Future |                      | Air Quality Improvement Will Benefit Your Physical Health |                       | Air Quality Improvement Will Benefit Your Happiness |                      |
|---------------------------------------------|----------------------------------------------------|----------------------|-------------------------------------------------------|----------------------|-------------------------------------------------|----------------------|---------------------------------------------------------------|----------------------|------------------------------------------------------|----------------------|-----------------------------------------------------------|-----------------------|-----------------------------------------------------|----------------------|
|                                             | N                                                  | %                    | N                                                     | %                    | N                                               | %                    | N                                                             | %                    | N                                                    | %                    | N                                                         | %                     | N                                                   | %                    |
| 1 strongly disagree                         | 58                                                 | 7.5                  | 23                                                    | 3.0                  | 26                                              | 3.4                  | 469                                                           | 60.5                 | 36                                                   | 4.6                  | 13                                                        | 1.7                   | 6                                                   | 0.8                  |
| 2                                           | 169                                                | 21.8                 | 81                                                    | 10.5                 | 101                                             | 13.0                 | 139                                                           | 17.9                 | 230                                                  | 29.7                 | 12                                                        | 1.5                   | 25                                                  | 3.2                  |
| 3                                           | 254                                                | 32.8                 | 180                                                   | 23.2                 | 196                                             | 25.3                 | 63                                                            | 8.1                  | 90                                                   | 11.6                 | 81                                                        | 10.5                  | 101                                                 | 13.0                 |
| 4                                           | 120                                                | 15.5                 | 208                                                   | 26.8                 | 215                                             | 27.7                 | 45                                                            | 5.8                  | 373                                                  | 48.1                 | 175                                                       | 22.6                  | 213                                                 | 27.5                 |
| 5 strongly agree                            | 43                                                 | 5.5                  | 205                                                   | 26.5                 | 169                                             | 21.8                 | 24                                                            | 3.1                  | 46                                                   | 5.9                  | 442                                                       | 57.0                  | 384                                                 | 49.5                 |
| total                                       | 644                                                | 83.1                 | 697                                                   | 89.9                 | 707                                             | 91.2                 | 740                                                           | 95.5                 | 775                                                  | 100.0                | 723                                                       | 93.3                  | 729                                                 | 94.1                 |
| Missing                                     | 131                                                | 16.9                 | 78                                                    | 10.1                 | 68                                              | 8.8                  | 35                                                            | 4.5                  | 0                                                    | 0.0                  | 52                                                        | 6.7                   | 46                                                  | 5.9                  |
| <b>Total</b>                                | <b>775</b>                                         | <b>100.0</b>         | <b>775</b>                                            | <b>100.0</b>         | <b>775</b>                                      | <b>100.0</b>         | <b>775</b>                                                    | <b>100.0</b>         | <b>775</b>                                           | <b>100.0</b>         | <b>775</b>                                                | <b>100.0</b>          | <b>775</b>                                          | <b>100.0</b>         |
| <b>Median wellbeing</b>                     |                                                    |                      |                                                       |                      |                                                 |                      |                                                               |                      |                                                      |                      |                                                           |                       |                                                     |                      |
| 1 strongly disagree                         |                                                    | 56                   |                                                       | 68                   |                                                 | 66                   |                                                               | 56                   |                                                      | 64                   |                                                           | 46                    |                                                     | 52                   |
| 2                                           |                                                    | 56                   |                                                       | 60                   |                                                 | 60                   |                                                               | 56                   |                                                      | 60                   |                                                           | 64                    |                                                     | 50                   |
| 3                                           |                                                    | 56                   |                                                       | 56                   |                                                 | 56                   |                                                               | 56                   |                                                      | 60                   |                                                           | 56                    |                                                     | 56                   |
| 4                                           |                                                    | 56                   |                                                       | 60                   |                                                 | 56                   |                                                               | 60                   |                                                      | 56                   |                                                           | 56                    |                                                     | 56                   |
| 5 strongly agree                            |                                                    | 64                   |                                                       | 56                   |                                                 | 60                   |                                                               | 56                   |                                                      | 56                   |                                                           | 60                    |                                                     | 60                   |
| <b>total</b>                                |                                                    | <b>56</b>            |                                                       | <b>56</b>            |                                                 | <b>56</b>            |                                                               | <b>56</b>            |                                                      | <b>56</b>            |                                                           | <b>56</b>             |                                                     | <b>56</b>            |
| <b>Spearman's rho</b>                       |                                                    | <b>0.093 *</b>       |                                                       | <b>−0.075</b>        |                                                 | <b>−0.074</b>        |                                                               | <b>−0.019</b>        |                                                      | <b>−0.127 **</b>     |                                                           | <b>0.073</b>          |                                                     | <b>0.088 *</b>       |
| <i>p</i>                                    |                                                    | 0.019                |                                                       | 0.050                |                                                 | 0.052                |                                                               | 0.603                |                                                      | 0.000                |                                                           | 0.050                 |                                                     | 0.018                |
| <i>n</i>                                    |                                                    | 635                  |                                                       | 689                  |                                                 | 699                  |                                                               | 730                  |                                                      | 763                  |                                                           | 716                   |                                                     | 721                  |
| <b>GLM controlling for design variables</b> |                                                    |                      |                                                       |                      |                                                 |                      |                                                               |                      |                                                      |                      |                                                           |                       |                                                     |                      |
| <b>Sqrt(b)</b>                              |                                                    | <b>0.2</b>           |                                                       | <b>0.2</b>           |                                                 | <b>0.2</b>           |                                                               | <b>−0.1</b>          |                                                      | <b>0.8</b>           |                                                           | <b>0.7</b>            |                                                     | <b>0.8</b>           |
| <b>95% CI</b>                               |                                                    | <b>(−1.0 to 1.5)</b> |                                                       | <b>(−1.0 to 1.3)</b> |                                                 | <b>(−0.9 to 1.3)</b> |                                                               | <b>(−1.2 to 1.0)</b> |                                                      | <b>(−0.2 to 1.9)</b> |                                                           | <b>( −0.5 to 2.0)</b> |                                                     | <b>(−0.5 to 2.1)</b> |

\*  $p < 0.10$ ; \*\*  $p < 0.05$ ; missing cases are coded as midpoint 3.



Table S8. Health variables.

| Variables                                                                                                                                                        | N   | %     | Median Wellbeing | GLM b (95% CI)     |
|------------------------------------------------------------------------------------------------------------------------------------------------------------------|-----|-------|------------------|--------------------|
| <b><i>Physical medical condition (stroke, COPD, heart, asthma, bronchitis, lung cancer in the past year diagnosed, inpatient, outpatient or attended ER)</i></b> |     |       |                  |                    |
|                                                                                                                                                                  |     |       | <i>p</i> = 0.005 |                    |
| No                                                                                                                                                               | 733 | 94.6  | 60               | 1.2 (−5.8 to 8.3)  |
| Yes                                                                                                                                                              | 36  | 4.6   | 44               | 0 <sup>a</sup>     |
| total                                                                                                                                                            | 769 | 99.2  | 56               |                    |
| System                                                                                                                                                           | 6   | 0.8   |                  |                    |
| Total                                                                                                                                                            | 775 | 100.0 |                  |                    |
| <b><i>Depression (past year diagnosed, inpatient, outpatient or attended ER)</i></b>                                                                             |     |       |                  |                    |
|                                                                                                                                                                  |     |       | <i>p</i> = 0.021 |                    |
| No                                                                                                                                                               | 756 | 97.5  | 60               | 7.0 (−8.4 to 22.3) |
| Yes                                                                                                                                                              | 6   | 0.8   | 26               | 0 <sup>a</sup>     |
| total                                                                                                                                                            | 762 | 98.3  | 56               |                    |
| System                                                                                                                                                           | 13  | 1.7   |                  |                    |
| Total                                                                                                                                                            | 775 | 100.0 |                  |                    |
| <b><i>Smoking <sup>a</sup></i></b>                                                                                                                               |     |       |                  |                    |
|                                                                                                                                                                  |     |       | <i>p</i> = 0.090 |                    |
| other                                                                                                                                                            | 130 | 16.8  | 60               | 6.1 (1.6 to 10.5)  |
| nonsmoker                                                                                                                                                        | 532 | 68.6  | 56               | 2.8 (−0.8 to 6.3)  |
| smoker                                                                                                                                                           | 113 | 14.6  | 56               | 0 <sup>a</sup>     |
| Total                                                                                                                                                            | 775 | 100.0 | 56               |                    |

<sup>a</sup> Smoking not included in final model due to large number of missing values; 0 <sup>a</sup> is the reference group that other levels of the factor are compared to.

**Table S9.** Design variables.

| Design Variables                                                                                  | N   | %     | Median Wellbeing        | GLM b (95% CI)       |
|---------------------------------------------------------------------------------------------------|-----|-------|-------------------------|----------------------|
| <b>Age</b>                                                                                        |     |       | <b><i>p</i> = 0.001</b> |                      |
| ≤22                                                                                               | 232 | 29.9  | 64                      | 8.6 ** (3.4 to 13.8) |
| 23–39                                                                                             | 395 | 51.0  | 56                      | 4.6 * (−0.3 to 9.4)  |
| 60+                                                                                               | 45  | 5.8   | 56                      | 4.2 (−2.8 to 11.3)   |
| 40–59                                                                                             | 70  | 9.0   | 56                      | 0 <sup>a</sup>       |
| total                                                                                             | 742 | 95.7  | 56                      |                      |
| System                                                                                            | 33  | 4.3   |                         |                      |
| Total                                                                                             | 775 | 100.0 |                         |                      |
| <b>Gender</b>                                                                                     |     |       | <b><i>p</i> = 0.000</b> |                      |
| Male                                                                                              | 343 | 44.3  | 56                      | −0.03 (−2.6 to 2.5)  |
| Female                                                                                            | 403 | 52.0  | 56                      | 0 <sup>a</sup>       |
| total                                                                                             | 746 | 96.3  | 56                      |                      |
| System                                                                                            | 29  | 3.7   |                         |                      |
| Total                                                                                             | 775 | 100.0 |                         |                      |
| <b>SES</b>                                                                                        |     |       | <b><i>p</i> = 0.942</b> |                      |
| Low SES (unemployed or basic schooling or low household income plus no high SES characteristics)  | 87  | 11.2  | 56                      | −2.3 (−6.7 to 2.2)   |
| Mid SES                                                                                           | 293 | 37.8  | 60                      | −0.7 (−3.4 to 2.1)   |
| High SES (lives in owner occupied house or high household income plus no low SES characteristics) | 180 | 23.2  | 56                      | 0 <sup>a</sup>       |
| total                                                                                             | 560 | 72.3  | 56                      |                      |
| System                                                                                            | 215 | 27.7  |                         |                      |
| Total                                                                                             | 775 | 100.0 |                         |                      |

\* *p* < 0.10; \*\* *p* < 0.05; 0<sup>a</sup> is the reference group that other levels of the factor are compared to.

## Appendix 1 Questionnaire

Dear participants:

Taking actions to address climate change has become the hotspot of the whole world, including Suzhou, where various measures have been implemented. These mitigation and adaptation actions can reduce greenhouse gas emissions, as well as affect your wellbeing via altering the surrounding external conditions. To better inform policy decisions, we designed a study to explore the impacts of these actions on wellbeing. To support this study, School of the Environment at Nanjing University is currently conducting an environment and health related questionnaire survey in Suzhou. The content of the questionnaire included five parts, namely wellbeing data, health data, living conditions, time activity diary and personal information.

You can participate our survey anonymously. All the information you provide will be kept strictly confidential and will be used only for this study. We promise no influence on your family or work. If you don't allow us to use your answers in our research or have any questions about the survey, please directly tell our volunteers or contact with the coordinating group:

Tel: 025-89680543

Fax: 025-89680533

E-mail: memo0904@sina.com

Address: School of the Environment, Nanjing University

Room B609, Qian Pansheng Building.

Nanjing 210023, China

Thank you for your support!

School of the Environment,

Nanjing University

August 2013

### Part 1 Wellbeing Information

In the next five questions, we ask for your wellbeing in the last two weeks. Please let us know how much you agree with the statements.

*Please tick ONE box for EACH statement.*

1. Over the last two weeks, I have felt cheerful and in good spirit\_\_\_\_\_
 

|                                                     |                                           |                                                     |
|-----------------------------------------------------|-------------------------------------------|-----------------------------------------------------|
| <input type="checkbox"/> All of the time            | <input type="checkbox"/> Most of the time | <input type="checkbox"/> More than half of the time |
| <input type="checkbox"/> Less than half of the time | <input type="checkbox"/> Some of the time | <input type="checkbox"/> At no time                 |
2. Over the last two weeks, I have felt calm and relaxed\_\_\_\_\_
 

|                                                     |                                           |                                                     |
|-----------------------------------------------------|-------------------------------------------|-----------------------------------------------------|
| <input type="checkbox"/> All of the time            | <input type="checkbox"/> Most of the time | <input type="checkbox"/> More than half of the time |
| <input type="checkbox"/> Less than half of the time | <input type="checkbox"/> Some of the time | <input type="checkbox"/> At no time                 |
3. Over the last two weeks, I have felt active and vigorous\_\_\_\_\_
 

|                                                     |                                           |                                                     |
|-----------------------------------------------------|-------------------------------------------|-----------------------------------------------------|
| <input type="checkbox"/> All of the time            | <input type="checkbox"/> Most of the time | <input type="checkbox"/> More than half of the time |
| <input type="checkbox"/> Less than half of the time | <input type="checkbox"/> Some of the time | <input type="checkbox"/> At no time                 |
4. Over the last two weeks, I woke up feeling fresh and rested\_\_\_\_\_
 

|                                                     |                                           |                                                     |
|-----------------------------------------------------|-------------------------------------------|-----------------------------------------------------|
| <input type="checkbox"/> All of the time            | <input type="checkbox"/> Most of the time | <input type="checkbox"/> More than half of the time |
| <input type="checkbox"/> Less than half of the time | <input type="checkbox"/> Some of the time | <input type="checkbox"/> At no time                 |
5. Over the last two weeks, my daily life has been filled with things that interest me\_\_\_\_\_
 

|                                                     |                                           |                                                     |
|-----------------------------------------------------|-------------------------------------------|-----------------------------------------------------|
| <input type="checkbox"/> All of the time            | <input type="checkbox"/> Most of the time | <input type="checkbox"/> More than half of the time |
| <input type="checkbox"/> Less than half of the time | <input type="checkbox"/> Some of the time | <input type="checkbox"/> At no time                 |

**Part 2 Life Satisfaction**

6. How satisfied are you with your life components? Please choose a number between 1 and 5 where 1 is *Not satisfied* at all and 5 is *Completely satisfied*.

Please tick ONE blank for EACH component.

| Life components    | 1 | 2 | 3 | 4 | 5 |
|--------------------|---|---|---|---|---|
| Work situation     |   |   |   |   |   |
| Family life        |   |   |   |   |   |
| Housing conditions |   |   |   |   |   |
| Neighbor           |   |   |   |   |   |
| Social life        |   |   |   |   |   |
| Air quality        |   |   |   |   |   |

**Part 3 Ontological Security**

7. Below are some opinions that people might have about themselves. How strongly do you agree or disagree with each one? Please choose a number between 1 and 5 where 1 is *Strongly agree* and 5 is *Strongly disagree*.

Please tick ONE blank for EACH statement.

| Statements                              | 1 | 2 | 3 | 4 | 5 |
|-----------------------------------------|---|---|---|---|---|
| I enjoy a challenge                     |   |   |   |   |   |
| I can deal with stress                  |   |   |   |   |   |
| I'm frightened of change                |   |   |   |   |   |
| I can do what I want, when I want       |   |   |   |   |   |
| Most people would like a life like mine |   |   |   |   |   |
| I feel in control                       |   |   |   |   |   |
| I feel safe                             |   |   |   |   |   |
| I worry about things going wrong        |   |   |   |   |   |
| I feel I'm doing well in life           |   |   |   |   |   |
| My life has a sense of routine          |   |   |   |   |   |

**Part 4 Health Information**

8. How satisfied are you with your health? Please choose a number between 1 and 4 where 1 is Not satisfied at all and 4 is Completely satisfied.

☐ 1 (Not satisfied at all)      ☐ 2      ☐ 3      ☐ 4 (Completely satisfied)

9. Below are some opinions that people might have about themselves.

Please tick ONE blank for EACH disease

| In the last 12 months | Have you been attacked by the diseases below?         | Yes            |    | No                           |    |                               |    |
|-----------------------|-------------------------------------------------------|----------------|----|------------------------------|----|-------------------------------|----|
|                       | Was it doctor diagnosis?                              | Yes            |    | No                           |    |                               |    |
| Diseases              | Have you been hospitalization for the diseases below? | Emergency room |    | In hospital, as an inpatient |    | In hospital, as an outpatient |    |
|                       |                                                       | Yes            | No | Yes                          | No | Yes                           | No |
|                       | Cerebral infarction                                   |                |    |                              |    |                               |    |
|                       | Coronary heart disease                                |                |    |                              |    |                               |    |
|                       | Myocardial infarction                                 |                |    |                              |    |                               |    |
|                       | Other heart diseases                                  |                |    |                              |    |                               |    |
|                       | Chronic obstructive pulmonary disease (COPD)          |                |    |                              |    |                               |    |
|                       | chronic bronchitis                                    |                |    |                              |    |                               |    |

Asthma  
Lung cancer  
Depression

## Part 5 Environment Opinions and Perceptions

10. In the next, we give seven statements about environment. Please let us know how much you agree with the statements. Please choose a number between 1 and 5 where 1 is *Strongly agree* and 5 is *Strongly disagree*.

Please tick ONE box for EACH statement

| Statements                                                             | 1 | 2 | 3 | 4 | 5 |
|------------------------------------------------------------------------|---|---|---|---|---|
| Air pollution could be ignored in the past two weeks                   |   |   |   |   |   |
| Air pollution has negative impacts on my physical health               |   |   |   |   |   |
| Air pollution has negative impacts on my happiness                     |   |   |   |   |   |
| It can be acceptable to sacrifice air quality for economic development |   |   |   |   |   |
| Suzhou's air quality will be improved in near future                   |   |   |   |   |   |
| Air quality improvement will benefit my physical health                |   |   |   |   |   |
| Air quality improvement will benefit my happiness                      |   |   |   |   |   |

## Part 6 Housing and Environment

11. Housing ownership: ☐ Own ☐ Renting ☐ Others\_\_\_\_\_
12. House type: ☐ House ☐ Apartment ☐ Others\_\_\_\_\_
13. Main household cooking fuel:  
☐ Woods ☐ Coal ☐ Liquefied gas  
☐ Natural gas ☐ Electricity 14. ☐ Other\_\_\_\_\_
15. Is there any smoke lampblack machine/range hoods in the kitchen? ☐ Yes ☐ No
16. Is there any heating or cooling devices like air conditioner, Central heating in your house?
17. ☐ Yes ☐ No ☐ Other\_\_\_\_\_
- If yes, are they in working order? ☐ Yes ☐ Partly ☐ No
18. Is your house or apartment near to the busy road? ☐ Yes ☐ No
19. Main transport mode:  
☐ Walk ☐ Bike ☐ Motorcycle  
☐ Bus/Metro ☐ Taxi/Private car 20. ☐ Other\_\_\_\_\_
21. Will you be annoyed by the noise when you are at home?  
☐ All of the time ☐ Most of the time ☐ More than half of the time  
☐ Less than half of the time ☐ Some of the time ☐ At no time
22. How many people are there in your neighborhood with whom you exchange small favors last two weeks?  
 An example would be leaving a key to let a repair man in.

Please WRITE the number of people in the boxes.

- I exchange favors with  people who live in my neighborhood in the last two weeks
23. How long does it take to go to public green space from your home?

- ☐ Less than 10 min by walking    ☐ 10–30 min by walking    ☐ More than 30 min by walking

**Part 7 Basic Information**

24. Sex: \_\_\_\_\_ Age: \_\_\_\_\_ Occupation: \_\_\_\_\_

25. Education:

- ☐ Primary School or below    ☐ Mid school    ☐ High school    ☐ Secondary specialized school  
☐ Junior college    ☐ Bachelor    ☐ Master or above

26. Are you a smoker: ☐ Yes    ☐ No

If yes, how many cigarettes do you smoke one day \_\_\_\_\_

If no, are you an ex-smoker? ☐ Yes ☐ No

27. Family monthly income (RMB):

- ☐ <500    ☐ 500–2000    ☐ 2000–5000    ☐ 5000–10,000  
☐ 10,000–20,000    ☐ 20,000–30,000    ☐ 30,000–50,000    ☐ More than 50,000

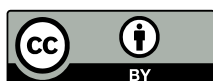

© 2016 by the authors; licensee MDPI, Basel, Switzerland. This article is an open access article distributed under the terms and conditions of the Creative Commons by Attribution (CC-BY) license (<http://creativecommons.org/licenses/by/4.0/>).
